# Supplementary material for: Dynamic mechanisms of biocide-mediated biofouling control in two-stage RO systems in wastewater reclamation: efficacy and microbial adaptation
Source: Royal Society of Chemistry journal article supplement (doi:10.1039/d5ew00057b), 2025-01-01
Supplement: d5ew00057b1.pdf [file d5ew00057b1.pdf]

## Supplementary Information

Dynamic mechanisms of biocide-mediated biofouling control in two-stage RO  
systems in wastewater reclamation: Efficacy and microbial adaptation

Haibo Gao <sup>1</sup>, Liang Xiong <sup>1</sup>, Yangzhou Su <sup>1</sup>, Qiang Liu <sup>1\*</sup>, Xiaolei Zhang<sup>1</sup>, and Ping Yao <sup>2,3\*</sup>

*1. School of Environmental & Chemical Engineering, Shanghai University, No. 99 Shangda Road, Shanghai 200444, China*

*2. School of Textile clothing & Arts Media, Suzhou Institute of Trade and Commerce, No. 287 Xuefu Road, Suzhou 215009, China*

*3. Jiangsu Engineering Research Center of Textile Dyeing and Printing for Energy Conservation, Discharge Reduction and Cleaner Production (ERC) , Soochow University, Suzhou 215123, China.*

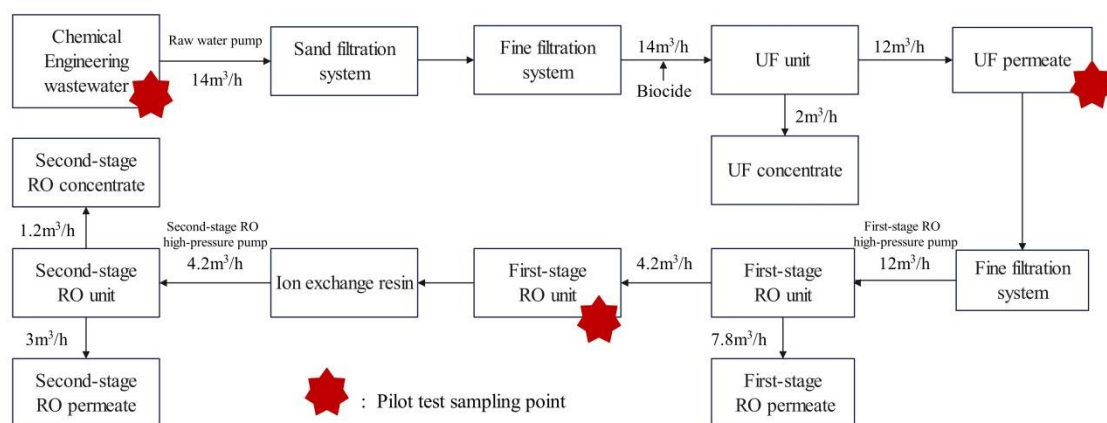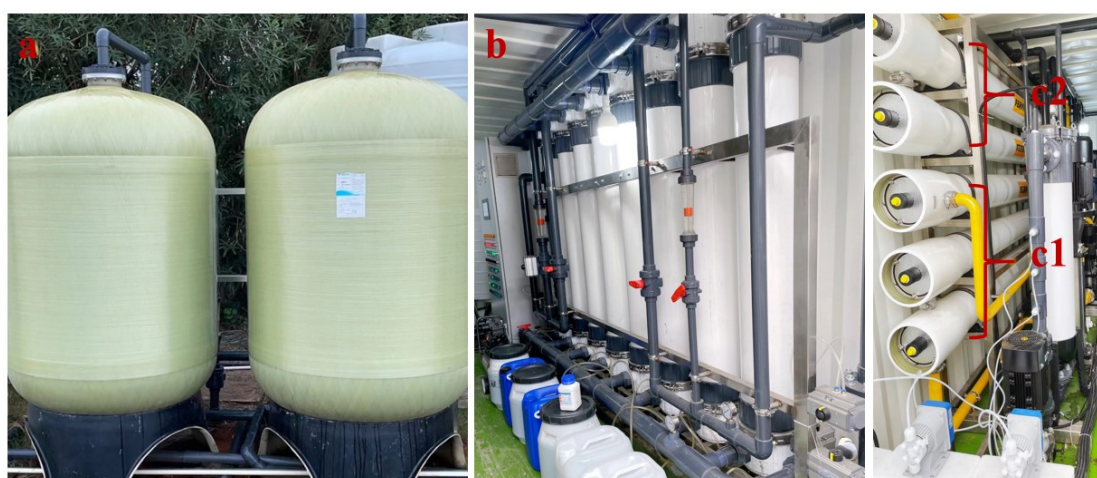

a: Sand filter tank, b: UF membrane module, c1: first stage RO membrane module, c2: second stage RO membrane module

**Fig. S1** The setup of onsite dual stage RO water reclamation system

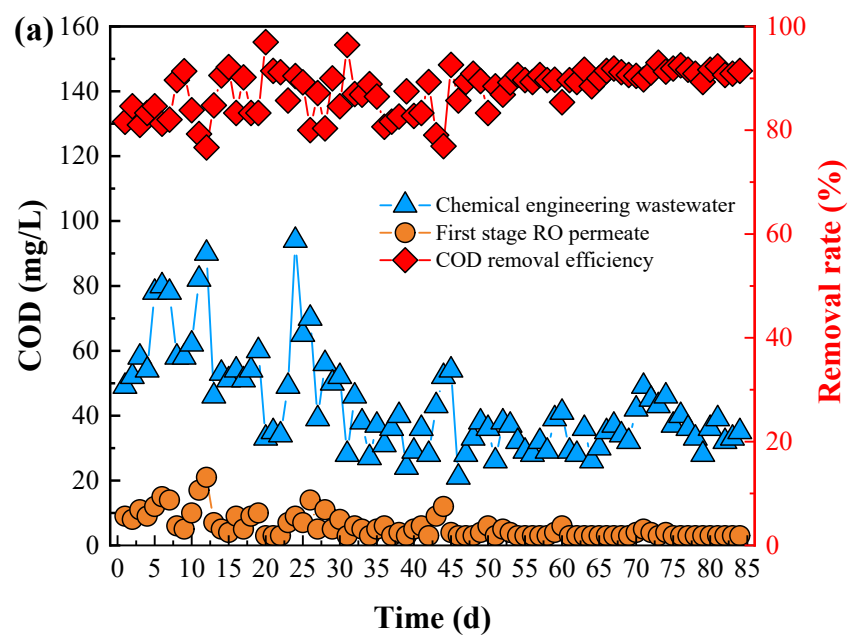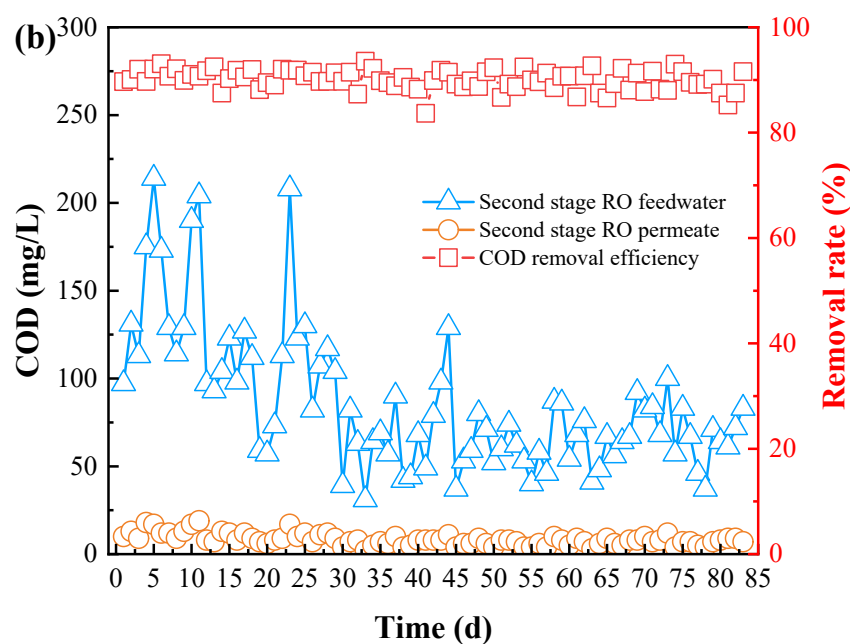

**Fig. S2** Effect of the first (a) and second stage RO membrane unit (b) on COD removal

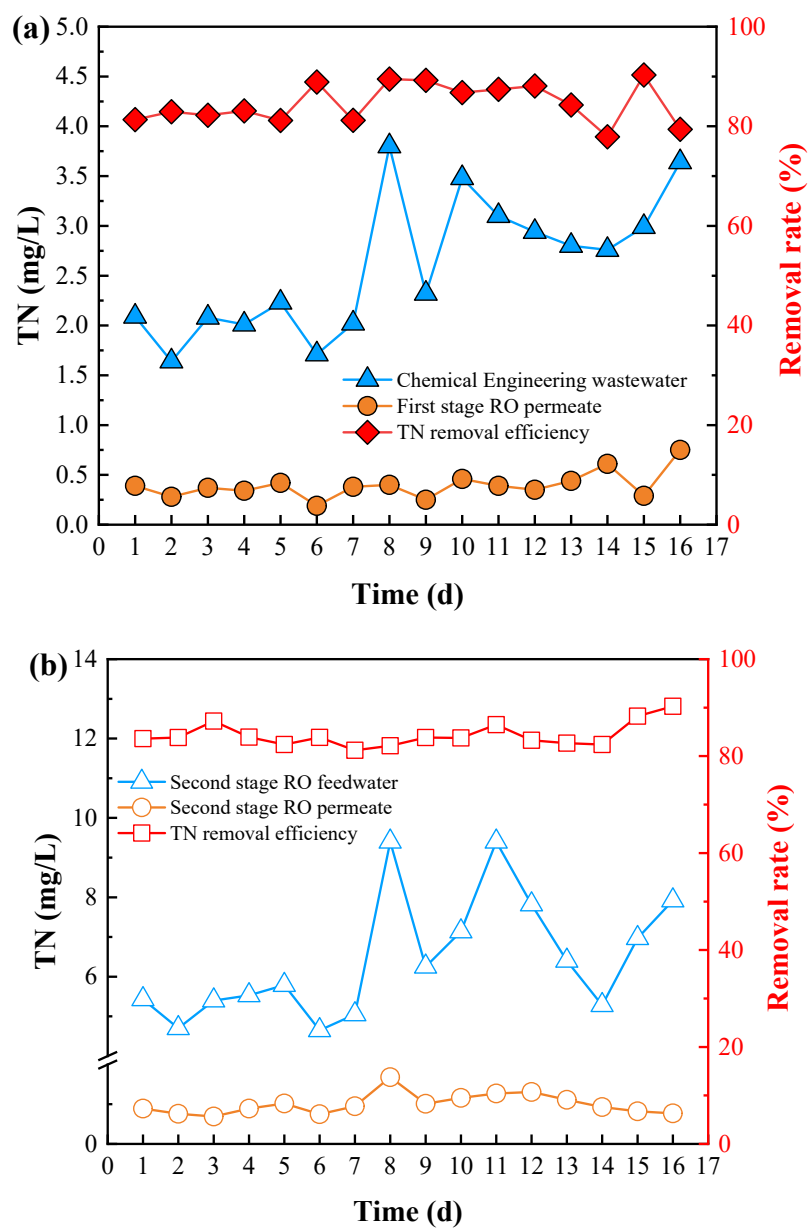

**Fig. S3** Effect of the first (a) and second stage RO membrane unit (b) on TN removal

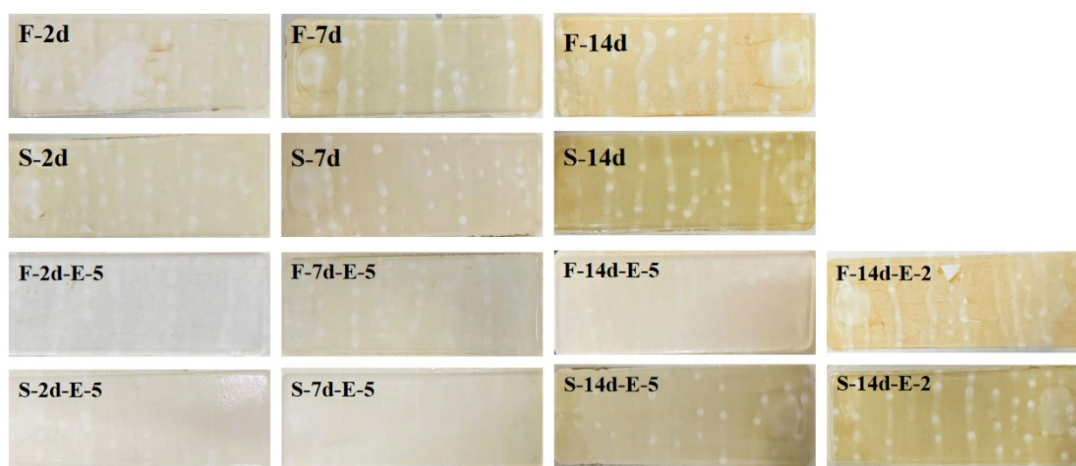

**Fig. S4** The images of fouling layers during 14 days of filtration with and without dosing of biocide

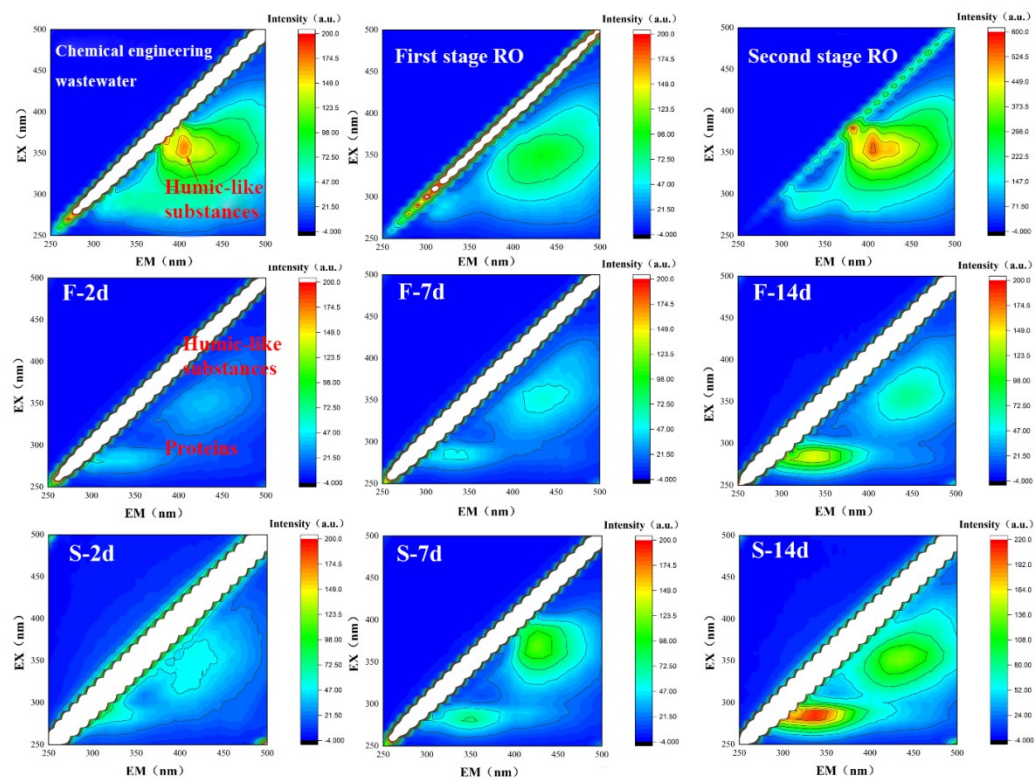

**Fig. S5** The EEMs images of fouling layers during 14 days of filtration without dosing of biocide

**Table S1** The quality of product water collected from laboratory scale RO filtration

| Feedwater sources             | EC<br>( $\mu\text{S}/\text{cm}$<br>) | COD<br>(mg/L) | TN<br>(mg/L) | TP<br>(mg/L) | Ca <sup>2+</sup><br>(mg/L) | Mg <sup>2+</sup><br>(mg/L) |
|-------------------------------|--------------------------------------|---------------|--------------|--------------|----------------------------|----------------------------|
| Primary wastewater            | 181.05                               | <3            | <0.1         | <0.1         | 0.7                        | 0.49                       |
| First stage RO                | 217.11                               | <3            | <0.1         | <0.1         | 0.75                       | 0.46                       |
| Second stage RO               | 242.51                               | <3            | <0.1         | <0.1         | 1.62                       | 0.92                       |
| First stage RO-2 mg/L MIT     | 227.12                               | <3            | <0.1         | <0.1         | 0.73                       | 0.55                       |
| First stage RO-5 mg/L MIT     | 175.24                               | <3            | <0.1         | <0.1         | 0.68                       | 0.42                       |
| Second stage RO-2 mg/L<br>MIT | 265.03                               | <3            | <0.1         | <0.1         | 1.61                       | 0.82                       |
| Second stage RO-5 mg/L<br>MIT | 235.24                               | <3            | <0.1         | <0.1         | 1.59                       | 0.85                       |

**Table S2** The meaning of sample numbers in experiments

| Sample numbers | The meaning of sample numbers in experiments                                       |
|----------------|------------------------------------------------------------------------------------|
| F-2d           | First stage RO on day 2, membrane samples (untreated)                              |
| F-7d           | First stage RO on day 7, membrane samples (untreated)                              |
| F-14d          | First stage RO on day 14, membrane samples (untreated)                             |
| S-2d           | Second stage RO on day 2, membrane samples (untreated)                             |
| S-7d           | Second stage RO on day 7, membrane samples (untreated)                             |
| S-14d          | Second stage RO on day 14, membrane samples (untreated)                            |
| F-2d-E-5       | First stage RO on day 2, membrane samples (after the addition of 5 mg/L biocide)   |
| F-7d-E-5       | First stage RO on day 7, membrane samples (after the addition of 5 mg/L biocide)   |
| F-14d-E-5      | First stage RO on day 14, membrane samples (after the addition of 5 mg/L biocide)  |
| F-14d-E-2      | First stage RO on day 14, membrane samples (after the addition of 2 mg/L biocide)  |
| S-2d-E-5       | Second stage RO on day 2, membrane samples (after the addition of 5 mg/L biocide)  |
| S-7d-E-5       | Second stage RO on day 7, membrane samples (after the addition of 5 mg/L biocide)  |
| S-14d-E-5      | Second stage RO on day 14, membrane samples (after the addition of 5 mg/L biocide) |
| S-14d-E-2      | Second stage RO on day 14, membrane samples (after the addition of 2 mg/L biocide) |



mg/L biocide)

---
